1           **Phospholipid membranes promote the early stage assembly of  $\alpha$ -**  
2                                               **synuclein aggregates**

3

4 Zhengjian Lv<sup>1,2,a</sup>, Mohtadin Hashemi<sup>1,a</sup>, Siddhartha Banerjee<sup>1</sup>, Karen Zagorski<sup>1</sup>, Jean-  
5 Christophe Rochet<sup>3,4</sup>, and Yuri L. Lyubchenko<sup>1,\*</sup>

6

7 <sup>1</sup>Department of Pharmaceutical Sciences, University of Nebraska Medical Center, 986025  
8 Nebraska Medical Center, Omaha, NE 68198-6025

9 <sup>2</sup>Bruker Nano Surfaces Division, 112 Robin Hill Road, Goleta, Santa Barbara, CA, 93117, USA

10 <sup>3</sup>Department of Medicinal Chemistry and Molecular Pharmacology and <sup>4</sup>Purdue Institute for  
11 Integrative Neuroscience, Purdue University, West Lafayette, Indiana, USA

12 <sup>a</sup> These authors contributed equally.

13 \* E-mail: [ylyubchenko@unmc.edu](mailto:ylyubchenko@unmc.edu)

14

15

16 Running title:  $\alpha$ -synuclein aggregation on membrane

17

18 **Abstract**

19 Development of Parkinson's disease is associated with spontaneous self-assembly of  $\alpha$ -  
20 synuclein ( $\alpha$ -syn). Efforts aimed at understanding this process have produced little clarity  
21 and the mechanism remains elusive. We report a novel effect of phospholipid bilayers on  
22 the catalysis of  $\alpha$ -syn aggregation from monomers. We directly visualized  $\alpha$ -syn  
23 aggregation on supported lipid bilayers using time-lapse atomic force microscopy. We  
24 discovered that  $\alpha$ -syn assemble in aggregates on bilayer surfaces even at the nanomolar  
25 concentration of monomers in solution. The efficiency of the aggregation process  
26 depends on the membrane composition, being highest for a negatively charged bilayer.  
27 Furthermore, assembled aggregates can dissociate from the surface, suggesting that on-  
28 surface aggregation can be a mechanism by which pathological aggregates are produced.  
29 Computational modeling revealed that interaction of  $\alpha$ -syn with bilayer surface changes  
30 the protein conformation and its affinity to assemble into dimers, and these properties  
31 depend on the bilayer composition. A model of the membrane-mediated aggregation  
32 triggering the assembly of neurotoxic aggregates is proposed.

33

34

35 **Key words:**  $\alpha$ -synuclein/amyloid aggregation/lipid bilayer/Parkinson's disease/time-  
36 lapse AFM

## 37 **Introduction**

38 Parkinson's disease (PD) is a devastating neurodegenerative disorder associated with the  
39 presence of cytosolic inclusions, named Lewy bodies (LBs), that contain amyloid-type  
40 fibrils typically localized to vertebrate presynaptic terminals ([Goedert et al, 2013](#)). These  
41 fibrils are assembled from  $\alpha$ -synuclein ( $\alpha$ -syn) protein, which is capable of spontaneous  
42 self-assembly into amyloid aggregates in solution ([Luth et al, 2015](#)). In addition to PD,  $\alpha$ -  
43 syn is associated with the development of several neurodegenerative diseases, including  
44 LB Dementia and Alzheimer's disease; however, the aggregation mechanism remains  
45 elusive ([Ahmed et al, 2010](#); [Friedrich et al, 2010](#); [Ross & Poirier, 2004](#)).

46 The self-assembly process of amyloid proteins, including  $\alpha$ -syn, has led to the  
47 amyloid cascade hypothesis (ACH), which posits that the spontaneous assembly of  
48 amyloidogenic polypeptides is the key feature that defines the disease state ([Hardy, 1992](#);  
49 [Hardy & Higgins, 1992](#); [Karran et al, 2011](#)). With numerous data supporting this  
50 hypothesis, it remains the one on which *in vitro* and *in vivo* studies related to the  
51 molecular mechanisms of amyloid aggregation are based. However, there is a serious  
52 complication when translating current knowledge on amyloid aggregation *in vitro* to the  
53 aggregation process *in vivo* — namely, the concentrations of amyloidogenic polypeptide  
54 are dramatically different *in vivo* versus *in vitro*. The critical concentration for the  
55 spontaneous aggregation of  $\alpha$ -syn *in vitro* is in the high micromolar range, in stark  
56 contrast to the nanomolar concentration range of  $\alpha$ -syn in the cerebrospinal fluid (CSF)  
57 ([Wang et al, 2012](#)). We have discovered a novel aggregation pathway that essentially  
58 eliminates the concentration issue with ACH. We were able to observe spontaneous  
59 assembly of A $\beta$  peptides and  $\alpha$ -syn proteins at the nanomolar concentration range  
60 ([Banerjee et al, 2017](#)). This novel pathway is an on-surface aggregation mechanism that  
61 allows A $\beta$  peptides of different sizes and  $\alpha$ -syn proteins to assemble into aggregates at  
62 the nanomolar range. The process takes place at ambient conditions, physiological pH  
63 values, and with no agitation. Based on our finding, we hypothesized that similar on-  
64 surface aggregation mechanism was possible on membrane surfaces.

65 Interaction of  $\alpha$ -syn aggregates with cellular membranes accompanied by changes  
66 in the membrane's properties is considered a mechanism of PD development ([Pfefferkorn  
67 et al, 2012](#)). One of the current models posits that neurotoxic effects are associated with  
68 membrane permeability and cell death mediated by interactions with oligomeric  $\alpha$ -syn  
69 ([Dante et al, 2008](#); [Green et al, 2004](#); [Quist et al, 2005](#); [Stockl et al, 2013](#)). Interestingly,  
70 monomeric  $\alpha$ -syn interacts with membranes as part of its normal function through  
71 binding to phospholipid molecules ([Davidson et al, 1998](#); [Diao et al, 2013](#)), a property  
72 that is neglected in current models involving the assembly of toxic aggregates in bulk  
73 solution. Past reports suggest that the normal membrane binding function of  $\alpha$ -syn is  
74 related to regulation of synaptic vesicle trafficking ([Davidson et al, 1998](#); [Diao et al, 2013](#);

75 [Venda et al, 2010](#)). The protein has also been shown to undergo accelerated aggregation  
76 when incubated in the presence of phospholipid vesicles at high protein:lipid ratios  
77 ([Galvagnion et al, 2015a](#); [Lee et al, 2002](#); [Ysselstein et al, 2015](#)). It is proposed that  $\alpha$ -  
78 syn aggregation at the membrane surface is stimulated both by the exposure of  
79 hydrophobic residues as the membrane-bound protein shifts from the long-helix form to  
80 the short-helix form ([Bodner et al, 2009](#); [Ysselstein et al, 2015](#)), and by the increased  
81 probability of molecular interactions needed for  $\alpha$ -syn self-assembly to occur on the two  
82 dimensional surface of the lipid bilayer than in solution ([Abedini & Raleigh, 2009](#)). The  
83 key role that membrane-induced  $\alpha$ -syn aggregation plays in neurotoxicity ([Ysselstein et  
84 al, 2015](#)), potentially via a mechanism involving membrane permeabilization ([Comellas  
85 et al, 2012](#); [Lee et al, 2012](#); [Reynolds et al, 2011](#); [Ysselstein et al, 2017](#)), is in line with  
86 our recent finding that surface interactions dramatically facilitates the aggregation  
87 process of amyloidogenic proteins, including  $\alpha$ -syn. Together, these findings suggest that  
88 self-assembly at the surface of cellular membranes is the mechanism by which potentially  
89 neurotoxic oligomers are assembled at physiological concentration of the protein  
90 ([Banerjee et al, 2017](#)).

91 In the current study, this hypothesis is tested by direct visualization of  $\alpha$ -syn  
92 aggregation on the surfaces of supported lipid bilayers (SLBs) using time-lapse atomic  
93 force microscopy (AFM). We demonstrate that SLBs catalyze the aggregation of  $\alpha$ -syn at  
94  $\alpha$ -syn concentrations as low as 10 nM, which corresponds to the concentration range in  
95 the CSF ([Wang et al, 2012](#)). Aggregation kinetics are found to be dependent on SLB  
96 composition, being considerably higher for 1-palmitoyl-2-oleoyl-sn-glycero-3-phospho-  
97 L-serine (POPS) bilayer when compared to 1-palmitoyl-2-oleoyl-sn-glycero-3-  
98 phosphocholine (POPC). The assembled aggregates are not strongly bound to the surface  
99 and are capable of spontaneous dissociation into solution. Importantly, the self-assembly  
100 process does not damage the surface, as no defects were detected after the aggregate  
101 dissociation. Computational modeling demonstrates that  $\alpha$ -syn monomers change  
102 conformation upon interaction with the bilayers and are dependent on bilayer  
103 composition. Conformations of  $\alpha$ -syn after binding to POPS dramatically facilitate  
104 assembly of the dimer; a property in contrast with that on POPC and in line with  
105 experimental data. We propose a model for the membrane mediated amyloid aggregate  
106 assembly and the role of this process in beginning of the disease state.

## 107 **Results and Discussion**

### 108 *Experimental AFM studies of $\alpha$ -syn aggregation on lipid bilayers*

109 Lipid bilayers were assembled on the surface of freshly cleaved mica, using the approach  
110 described in the methods section, allowing for direct visualization of interactions between  
111 the protein and bilayer over many hours with AFM. Based on their prevalence in  
112 neuronal cellular membranes, three types of bilayers were used (Figure 1a): POPC, POPS,

113 and an equimolar mixture of the two. The time-lapse AFM studies require that the bilayer  
114 is stable during the entire multi-hour AFM experiments. Additionally, the surface needs  
115 to be smooth, so protein aggregates can be detected as they are formed. We developed a  
116 procedure to assemble POPC and POPS bilayers, with no defects, over areas as large as 4  
117  $\mu\text{m} \times 4 \mu\text{m}$  (Figure 1b and Appendix Figure S1). Each surface was tested for smoothness  
118 and stability prior to AFM studies of  $\alpha$ -syn-membrane interactions. The stability and  
119 smoothness of the bilayer with the defect-free topography is illustrated in Appendix  
120 Figure S1. Only such smooth surfaces were used to conduct experiments.

121 After exchanging the buffer with a solution of  $\alpha$ -syn, the bilayer was observed by  
122 time-lapse AFM imaging. Aggregation of  $\alpha$ -syn on supported POPC bilayers was  
123 investigated over a period of 5 hours and the data is shown in Figure 1. Figure 1b shows  
124 the POPC surface immediately after exchange of buffer with 10 nM  $\alpha$ -syn solution.  
125 Aggregates appear after 3 h of incubation, as indicated with arrows in Figure 1c. More  
126 aggregates appear over the next two hours of observation, and their sizes increase as well  
127 (Figures 1d-e). The number of aggregates and the aggregate sizes (volumes) were  
128 measured and are plotted in Figure 1f. The data shows that both parameters gradually  
129 increase over time. Similar time-lapse aggregation experiments were performed on APS-  
130 functionalized mica to compare the aggregation with aggregation on POPC SLB surface.  
131 The results are assembled as Appendix Figure S2. Qualitatively, aggregation on APS  
132 mica exhibits a similar trend to the POPC bilayer, with aggregates appearing after 3 h  
133 incubation (Appendix Figure S2e). However, the aggregation is less efficient as measured  
134 by the number and sizes of aggregates (Appendix Figures S2h and Figure EV1). Note  
135 that very few aggregates were found in a 10 nM solution of  $\alpha$ -syn incubated under the  
136 same conditions in the absence of a phospholipid bilayer or mica surface.

137 To test the effect of the bilayer composition on  $\alpha$ -syn aggregation, experiments  
138 were done with POPS bilayers. POPS shares hydrocarbon chains with POPC but has a  
139 serine head group that, at physiological pH, renders the surface negatively charged,  
140 unlike POPC which has a net neutral charge. AFM images in Figure 2 demonstrate that  
141 on POPS, aggregates appear after 1 h of incubation (Figure 2a), with the surface densely  
142 covered with  $\alpha$ -syn aggregates after 5 h incubation (Figure 2b-d). Quantitative analysis  
143 demonstrated that the number of aggregates and their size increase over time (Figure 2e).  
144 The volume distribution histograms at each time point are shown in Figure EV1 (for  
145 more data see table 1). Compared with POPC, aggregation on POPS bilayers was  
146 accelerated, with the first detectable aggregates appearing after 1 h (POPS) vs 3 h  
147 (POPC). In addition, at the end of the experiment the number of aggregates was more  
148 than double for POPS (404) vs. POPC (190), and aggregates formed in the presence of  
149 POPS had a larger mean volume ( $417 \text{ nm}^3$  for POPS vs  $276 \text{ nm}^3$  for POPC) (Figure EV1  
150 and Table 1).

151 The aggregation of  $\alpha$ -syn on a bilayer consisting of an equimolar mixture of  
152 POPC and POPS was the third bilayer composition tested. AFM data from the time-lapse  
153 experiments are shown in Figure 3. Aggregates appear after two hours (panel a), and their  
154 number increases over time (panels a-d). Quantitative analysis (Figure 3e) shows that the  
155 number and sizes of the aggregates grow monotonically with time. Although the number  
156 of aggregates on POPC/POPS is close to that on POPS (372 vs 404), the average size of  
157 aggregates was much smaller (see panel ‘Experiment 1’ in Table 1; mean volume of 312  
158 nm<sup>3</sup> on POPC/POPS vs 417 nm<sup>3</sup> on POPS). Furthermore, the first appearance of  
159 aggregates on the equimolar mixture SLB is 1 h later than POPS SLB. The volume  
160 distributions at each time point for the POPC/POPS SLB is shown in Figure EV1 and  
161 Table 1. A direct comparison of aggregates on the different bilayer surfaces shows that  
162 the general aggregation propensity follows this order: POPS > POPC/POPS > POPC  
163 (Table 1).

164 The data from time-resolved experiments allows us to follow the dynamics of  
165 individual aggregates. Images in Figure 4 are scans of the same area taken during a 30-  
166 minute interval. The aggregates are highlighted with arrows of different colors to indicate  
167 different types of aggregate dynamics. New aggregates appearing in panel B are  
168 highlighted with green arrows. The aggregates that do not change between panels A and  
169 B are marked with transparent black arrows. One aggregate on panel A dramatically  
170 increases in size in panel B and is highlighted with a yellow arrow. Interestingly, several  
171 aggregates highlighted in blue in panel A are missing in panel B, suggesting that these  
172 aggregates spontaneously dissociate from the surface during the 30-minute interval.  
173 Importantly, the surface remains smooth, indicating that no damage occurs to the bilayer  
174 surface following dissociation of the aggregates. Thus, aggregates assembled on the  
175 surface can dissociate back into solution, suggesting that aggregates should appear in the  
176 bulk solution above the bilayer. This assumption was tested by direct measurement of the  
177 time-dependent accumulation of  $\alpha$ -syn aggregates in solution above the bilayer surface.  
178 To achieve this, aliquots were taken from the bulk solution (above bilayers), deposited on  
179 mica, imaged with AFM, and the aggregates analyzed. The results obtained for the  
180 sample taken in the presence and absence of SLBs are shown in Figure 5. The presence  
181 of the bilayer produces significantly more aggregates (solid black bars) compared to the  
182 control (dashed bars), supporting the conclusion about dissociating aggregates assembled  
183 on the lipid bilayer. Note that similar effect were observed in our recent paper ([Banerjee  
184 et al, 2017](#)), in which the assembly of  $\alpha$ -syn aggregates on mica surface was studied.

### 185 *Computational modeling of interaction of $\alpha$ -syn with lipid bilayers*

186 To obtain insight into the underlying molecular mechanism of  $\alpha$ -syn aggregation on the  
187 bilayer surface, we used molecular dynamics (MD) simulations of interaction of  $\alpha$ -syn  
188 with the POPC and POPS bilayers. Briefly, a monomer of  $\alpha$ -syn was placed 6 nm above

189 the center of a 13 nm x13 nm bilayer patch (512 lipids), and interactions with the bilayer  
190 were then simulated. A few selected snapshots illustrating the dynamics of the interaction  
191 of  $\alpha$ -syn with the POPC bilayer are shown in Figure 6a. The set of data for the interaction  
192 with POPC is assembled as Movie EV1. According to Figure 6a,  $\alpha$ -syn initially binds to  
193 the POPC membrane through its N-terminal segment (frame (ii)). Over time, the length  
194 of the segment of the protein in contact with the POPC surface increases, so that the NAC  
195 segment approaches the surface as well (frames (iii-iv)). Graphically this change in  
196 binding is illustrated by the kymograph shown in Appendix Figure S3a. In fact,  $\alpha$ -syn  
197 undergoes multiple association-dissociation events, as evidenced by the fluctuations of  
198 the number of contacts over time (Appendix Figure S3c). Eventually (after  $\sim 1.5 \mu\text{s}$ , seen  
199 as a jump in the graph), the protein strongly interacts with the bilayer and stays bound to  
200 the surface for the remainder of the simulation. Throughout the simulation the end-to-end  
201 distance and the radius of gyration of the  $\alpha$ -syn molecule experience minor fluctuations  
202 (Appendix Figure S3d and e).

203 A similar analysis was performed for the  $\alpha$ -syn interaction with a POPS bilayer.  
204 A few selected frames are shown in Figure 6b, and the full set of data for the interaction  
205 is assembled as Movie EV2. Similar to the data obtained for the POPC bilayer, the N-  
206 terminal segment of  $\alpha$ -syn binds to the membrane surface, but unlike POPC, the  
207 interaction with POPS is limited to a short central region (G36-K58) of the protein,  
208 graphically illustrated by Appendix Figure S3b. As a result, the protein remains extended  
209 out of the plane of the POPS surface.

210 We then modeled the interaction of membrane-bound  $\alpha$ -syn with a second free  $\alpha$ -  
211 syn molecule; the results are shown in Figure 7. Frame (i) in Figure 7a shows the second  
212 protein floating around the bound  $\alpha$ -syn on POPC, but later (frame ii) it moves away  
213 from the bound protein and binds to the other side of the bilayer, gradually increasing the  
214 number of segments interacting with the bilayer as shown in frames (iii) to (iv). An  
215 animation of the dynamics is assembled as Movie EV3. Simulations with POPS bilayer  
216 produce entirely different results. According to Figure 7b, a free protein shown in frame  
217 (i) very rapidly binds to membrane-bound extended  $\alpha$ -syn, and the dimer is formed  
218 rapidly after only 15 ns (frame (ii)) via interactions involving the two protein molecules'  
219 NAC segments and via NAC-C-terminal interactions. The proteins in frame (iii) re-  
220 arrange the orientation to a parallel one with an extended NAC-NAC interaction interface  
221 (frames (iv)-(v)), and the dimer remains stable for the remainder of the simulation. The  
222 COM distance plot, Figure 7c, further corroborates these observations, with the distance  
223 on POPS quickly stabilizing to approximately 2.5 nm, while on POPC the distance is  
224 large fluctuating around 7 nm which is equal to the thickness of the bilayer plus  
225 contributions from the position on the bilayer surface (XY diffusion). The dynamic  
226 process is presented in Movie EV4. Furthermore, geometric analysis of the proteins,  
227 Appendix Figure S4, demonstrates that interactions within the dimer (on POPS) primarily

228 occur between the NAC and C-terminal segments of the membrane-bound protein and the  
229 second  $\alpha$ -syn molecule.

230 Overall, our studies demonstrate that phospholipid bilayers catalyze  $\alpha$ -syn  
231 aggregation at conditions where no aggregates are assembled in bulk solution. The  
232 aggregation process was directly observed using time-lapse AFM, showing the number  
233 and size of aggregates increasing proportionally with incubation time. The efficient  
234 assembly of aggregates on phospholipid bilayers is in line with other studies ([Galvagnion  
235 et al, 2016](#); [Galvagnion et al, 2015b](#)) in which acceleration of  $\alpha$ -syn fibrils formation on  
236 phospholipid vesicles was reported. There are a number of important features of this self-  
237 assembly process catalyzed by the membrane bilayers.

238 First, the aggregation efficiency depends on the phospholipid composition, with  
239 general aggregation propensity on surfaces following this order: POPS > POPC/POPS >  
240 POPC (Table 1). POPS is an anionic phospholipid, suggesting that electrostatic  
241 interaction between the negatively charged surface and positively charged segment of  $\alpha$ -  
242 syn containing lysine residues contributes to the catalytic effect of the POPS surface, in  
243 line with ([Pfefferkorn et al, 2012](#)). This interpretation is supported by the computational  
244 results. Simulations revealed that lysine residues are critically involved in the initial  
245 interaction with the membrane surface. Moreover, bilayer composition also contributes to  
246 the  $\alpha$ -syn structure, which then affects the aggregation propensity of the protein. This is  
247 evident in the simulations with membrane-bound and free  $\alpha$ -syn molecules; in particular  
248 for POPS, the  $\alpha$ -syn protein is extended from the bilayer and acts as an attachment point  
249 for free proteins to assemble the dimer (Figure 7b and Movie EV4). This extended  
250 arrangement is in line with recent structural data ([Fusco et al, 2014](#)), according to which,  
251 three regions of membrane-bound  $\alpha$ -syn exhibit distinct structural and dynamic  
252 properties. Thus, that  $\alpha$ -syn has differential binding modes on different lipid bilayers,  
253 which may alter the overall protein structure and contribute to a change in aggregation  
254 propensity of the protein.

255 Second, it is widely accepted that interaction of amyloid proteins, including  $\alpha$ -syn,  
256 with lipid bilayers is accompanied with the change of the bilayer structure and even  
257 disruption of the bilayer ([Jo et al, 2000](#); [Yip et al, 2002](#); [Yip & McLaurin, 2001](#)). The  
258 formation of channel-like features assembled by amyloid proteins oligomers is reported  
259 in ([Quist et al, 2005](#); [Stockl et al, 2013](#)). We have not observed such changes in the  
260 bilayer structure in the present study. In Figure 4 aggregate highlighted with blue  
261 dissociate and does not appear in frame B, however no damage to the bilayer surface is  
262 seen in the images prior and after the aggregate dissociation. This finding suggests that in  
263 our experiments the interaction of  $\alpha$ -syn takes place with the bilayer groups located on  
264 the surface or in the proximity of the surface without insertion of the protein into the  
265 bilayer. Computer simulations support these observations, showing that  $\alpha$ -syn interaction



266 with POPC and POPS bilayers occur through the lipid head groups and in the interfacial  
267 region of the head groups. Explanation can be found in the concentration of amyloid  
268 protein used. For example, the  $\alpha$ -syn pores in ([Quist et al, 2005](#)) were assembled with  $\alpha$ -  
269 syn concentration three orders of magnitude higher than in our experiments. Another  
270 explanation for the discrepancy could be the presence of defects on the bilayer.  $\alpha$ -Syn  
271 aggregates are reported to sense packing defects, and induce lateral expansion of lipid  
272 molecules that progress further to bilayer remodeling by insertion of  $\alpha$ -syn into the  
273 headgroup region ([Ouberai et al, 2013](#)). In our study, we developed a procedure by which  
274 the bilayers remain defect-free during the entire time-lapse experiment (Appendix Figure  
275 S1). This model is in line with the data of Chaudhary and coworkers ([Chaudhary et al,](#)  
276 [2016](#)), in which homogeneous bilayers remain intact despite the formation of  $\alpha$ -syn  
277 oligomers.

278 Third, the self-assembly of aggregates on the membrane bilayers is a dynamic  
279 process. In addition to gradual growing of the aggregate, some of them can dissociate  
280 from the surface to the bulk solution (Figure 4). This process leads to the accumulation of  
281 aggregates in the solution and direct measurements (Figure 5) support this phenomenon.  
282 Our combined experimental and computer modeling approaches demonstrate that the on-  
283 surface aggregation is a dynamic process, so the assembled aggregate can dissociate from  
284 the surface to the bulk solution. As a result, the dissociated aggregates can play roles of  
285 seeds for aggregation in the bulk solution or act as neurotoxic agents. Both processes lead  
286 to neurodegeneration. Importantly, in the vast majority of cases, we found that aggregates  
287 formed on the surface are oligomers, which are considered to be the most neurotoxic  
288 amyloid aggregates.

289 Based on these studies, we propose the model of amyloid aggregate assembly  
290 catalyzed by cellular membranes schematically shown in Figure 8. Interaction of the  
291 protein with the membrane changes the protein conformation (panel b), facilitating the  
292 interaction with other proteins and assembly of the oligomer (scheme c). The process  
293 repeats as more proteins appear leading to the assembly of larger oligomers (scheme d).  
294 The assembled oligomer can dissociate from the surface to the intracellular space starting  
295 the neurodegeneration effect (scheme e).

296 One of critical properties of the on-surface aggregation process is that the  
297 aggregates form at concentrations as low as the nanomolar range, which corresponds to  
298 the typical physiological concentrations of endogenic proteins such as  $\alpha$ -syn ([Wang et al,](#)  
299 [2012](#)). Spontaneous assembly of aggregates in the bulk solution require concentrations  
300 several orders of magnitude higher ([Bousset et al, 2013](#)), and the amyloid cascade  
301 hypothesis considers accumulation of amyloid proteins, which is one of the problem of  
302 this model of PD. The problem of the high concentration is alleviated if the assembly  
303 occurs on the membrane bilayers. The second important feature of the on-surface  
304 aggregation is that the composition of the bilayer contributes to the surface aggregation

305 propensity – namely, a higher anionic lipid content favors  $\alpha$ -syn-membrane interactions  
306 and lipid-induced  $\alpha$ -syn aggregation. Previously reported findings suggest that the levels  
307 of anionic lipids in the brain increases with aging ([Giusto et al, 2002](#)) and that the ratio of  
308 acidic to zwitterionic phospholipids increases in PD brain ([Riekkinen et al, 1975](#)). Based  
309 on these data and our observations, we hypothesize that amyloidogenic aggregates of  $\alpha$ -  
310 syn assemble on cellular membrane and the membrane composition is the factor that  
311 controls the aggregation process ([Ysselstein et al, 2017](#); [Ysselstein et al, 2015](#)). For  
312 membranes with normal composition, assembled aggregates are unstable and dissociate  
313 as observed in computational modeling of POPC bilayers. A change in the membrane  
314 composition, such as switch from POPC rich to POPS rich, leads to a dramatic increase  
315 of stability of the dimers, facilitating the assembly of higher order oligomers. Therefore,  
316 we posit that the composition of cellular membranes is the factor that defines the healthy  
317 state of neurons. Changes in membrane composition leading to an increase in affinity of  
318  $\alpha$ -syn for the cell surfaces and favors the formation of stable oligomers and thereby  
319 triggers development of the disease.

320 The proposed model is a significant departure from the current amyloid  
321 aggregation model and has two important features. First, it does not require the increase  
322 of  $\alpha$ -syn synthesis to the level allowing for the spontaneous assembly in aggregates (a  
323 few orders of magnitude). Lowering of the protein level is a logical consequence of the  
324 drug development efforts in the framework of traditional amyloid aggregation model that  
325 did not succeed ([Brundin et al, 2017](#); [Busche et al, 2015](#)). Second,  $\alpha$ -syn is the protein  
326 actively involved in important physiological processes such as the signal transduction in  
327 the neuron synapse ([Venda et al, 2010](#)). Lowering its level can impair these important  
328 processes. In the framework of our model, the protein concentration is not a critical  
329 parameter. The property of membrane, such as its ability to facilitate the aggregate  
330 assembly mediated by the membrane composition is the factor that defines the disease  
331 state, suggesting that preventions and treatments should be focused on the control the  
332 membrane composition that can be achieved via controlling the lipid metabolism.

333 Although the data presented in this paper are obtained for  $\alpha$ -syn, the membrane  
334 aggregation model can be extended to the amyloidogenic proteins and hence to other  
335 diseases. The support comes from our recent paper ([Banerjee et al, 2017](#)) in which  
336 aggregation of  $\alpha$ -syn along with the full-size amyloid beta protein ( $A\beta$ ) on mica surfaces  
337 were performed. For both proteins, interaction with the surface dramatically facilitated  
338 the aggregation process. Our preliminary data on aggregation of  $A\beta$ 42 protein revealed a  
339 similar catalytic property for aggregation on both POPC and POPS bilayers and hence  
340 support our membrane catalyzing model for amyloid aggregation as the molecular  
341 mechanism of development of neurodegenerative diseases mediated by protein  
342 aggregation.

343

## 344 **Materials and methods**

### 345 *Materials*

346 1-Palmitoyl-2-oleoyl-sn-glycero-3-phosphocholine (POPC) and 1-palmitoyl-2-oleoyl-sn-  
347 glycero-3-phospho-L-serine (POPS) were purchased from Avanti Polar Lipids, Inc,  
348 Alabama, US; Chloroform (> 99.5%, Sigma–Aldrich Inc.); dry bath incubator (Fisher  
349 Scientific); A 10 mM pH 7.4 sodium phosphate buffer (PBS, NaH<sub>2</sub>PO<sub>4</sub>•H<sub>2</sub>O: Na<sub>2</sub>HPO<sub>4</sub> =  
350 1:3.4 without additional salt) was prepared and filtered through a disposable Millex-GP  
351 syringe filter unit (0.22 μm) before use. Deionized (DI) water (18.2 MΩ, 0.22 μm pore  
352 size filtered, APS Water Services Corp., Van Nuys, CA) was used for all experiments.  
353 Muscovite mica (Asheville Schoonmaker Mica Co., Newport News, VA). 1-(3-  
354 aminopropyl)silatrane was synthesized as previously described ([Rauscher et al](#));  
355 ImmEdge hydrophobic barrier pen (Vector Laboratories, Inc. Burlingame, CA); Aron  
356 alpha industrial glue (Toagosei America, West Jefferson, Ohio); S/P Brand Bev-L-Edge  
357 micro glass slides (Allegiance Healthcare Corporation, McGaw Park, IL).

### 358 *Preparation of α-syn solution*

359 Wild-type A140C α-syn in which the C-terminal alanine was replaced with a cysteine  
360 was prepared as described previously ([Krasnoslobodtsev et al, 2012](#)). α-Syn solutions  
361 were freshly prepared by dissolving 0.4 to 0.8 mg of the lyophilized powder in 200 μL  
362 water (the pH was adjusted to 11 with NaOH), in the presence of 1 μL of 1 M  
363 dithiothreitol (DTT) to break disulfide bonds, followed by the addition of 300 μL of 10  
364 mM sodium phosphate buffer (pH 7.4). The solution was filtered through an Amicon  
365 filter with a molecular weight cutoff of 3 kDa at 14,000 rpm for 15 min. The filtration  
366 was repeated 3 times to completely remove free DTT. The concentration of the stock  
367 solutions was determined by spectrophotometry (Nanodrop<sup>®</sup> ND-1000, DE) using the  
368 molar extinction coefficients 1280 cm<sup>-1</sup>·M<sup>-1</sup> and 120 cm<sup>-1</sup>·M<sup>-1</sup> for tyrosine and cysteine at  
369 280 nm, respectively. In general, freshly prepared stock solutions were used for all the  
370 experiments.

### 371 *Preparation of APS-mica*

372 Freshly cleaved mica strips (5.0 × 1.5 cm, L×W.) were immersed in plastic cuvettes  
373 containing 167 μM APS solution for 30 min ([Krasnoslobodtsev et al, 2012](#); [Lv et al,](#)  
374 [2015](#)), followed by rinsing with deionized water and drying in argon flow. The APS-mica  
375 was stored in a vacuum chamber for use over the following few weeks ([Shlyakhtenko et](#)  
376 [al, 2013](#)). The APS-mica strips were cut into ~1.5 × 1.5 cm pieces and glued to a glass  
377 slide for sample preparation.

378

### 379 *Preparation of SLBs*

380 We followed a published protocol with minor modifications ([Shlyakhtenko et al, 2013](#)).  
381 Lipid powder (25 mg) was first dissolved in 1 mL chloroform to make a 25 mg/mL stock  
382 solution. The stock solution was aliquoted and stored at -20 °C. The aliquoted solution  
383 (20 µL) was thawed and brought to room temperature before it was blow dried with a  
384 gentle argon flow and vacuum desiccated overnight. Next, a 1 mL solution of 10 mM  
385 sodium phosphate buffer (pH 7.4) was injected into the glass container to make a 0.5  
386 mg/mL solution, unless a different concentration is stated. The solution was sonicated  
387 (Branson 1210, Branson Ultrasonics, Danbury, CT) until mostly clear to obtain small  
388 unilamellar vesicles. A mica piece mounted on a glass slide was then prepared for  
389 experiments by drawing around the perimeter of the mica with a hydrophobic pen to  
390 prevent overflow. 60 to 80 µL of the lipid solution was deposited onto the freshly cleaved  
391 mica surface. The incubation of lipid solution was done at 60 °C while buffer was  
392 supplied periodically. After 1 h, excess lipids were washed off by extensive gentle  
393 exchange of the lipid solution with buffer. The resulting SLB was kept in buffer and  
394 imaged.

#### 395 *In situ time-lapse AFM imaging in liquid*

396 AFM imaging was conducted on an MFP-3D (Asylum Research, Santa Barbara, CA).  
397 Tapping mode was used. A MSNL cantilever (Bruker, Santa Barbara, CA) with nominal  
398 spring constant of 0.1 N/m was used for imaging in liquid. The resonance frequency  
399 varied between 7 kHz to 9 kHz. The scan size was 5 µm × 5 µm, and the scan rate was 1  
400 Hz. Buffer was injected periodically to keep the sample at constant volume. For in situ  
401 time-lapse AFM experiments, the images were acquired at different time points. Between  
402 images, the AFM tip was placed on idle (electronically retracted, approximately 4 µm  
403 above the scan area) to ensure that it exerted minimum influence on the sample.

#### 404 *Data analysis*

405 All AFM images were flattened and then processed using Femtoscan software (Advanced  
406 Technologies Center, Moscow, Russia). The features on bilayer surfaces were visually  
407 inspected and analyzed using “Grain analysis” in the software. Volumes of aggregates  
408 were arranged in histograms and fit with a Gaussian distribution using Origin Pro  
409 software (OriginLab, Northampton, MA), yielding Mean ± SD values. Scatter plots of  
410 number/volume against incubation times were drawn with the Origin software.

#### 411 *Molecular dynamics simulations*

412 Lipid bilayers of POPC and POPS were prepared using the *insane.py* script (available at  
413 <http://md.chem.rug.nl>) using the MARTINI2.2refP ([de Jong et al, 2013](#)) force field  
414 together with the polarizable water ([Yesylevskyy et al, 2010](#)) model. The initial bilayer  
415 was constructed using, in total, 512 lipids placed randomly in a bilayer structure with 40  
416 water molecules per lipid and 150 mM NaCl. After energy minimization using the

417 steepest decent algorithm, the bilayers were simulated as an NPT ensemble for 500 ns  
418 using a 20 fs integration time step. The simulation employed periodic boundary  
419 conditions (PBC) with a semi-isotropic pressure coupling using the Parrinello-Rahman  
420 barostat at 1 bar with a 12 ps coupling constant. The temperature was kept at 300 K using  
421 the velocity rescaling algorithm. Electrostatic interactions were calculated using the  
422 particle mesh Ewald algorithm, with a real space cut-off of 1.1 nm. All simulations were  
423 performed using the 2016 version of the GROMACS suite of programs ([Abraham et al.](#)  
424 [2015](#)). Only the final frame of each bilayer simulation was used for further simulations.

425 Micelle-bound  $\alpha$ -syn (PDB ID: 1XQ8) was used as the initial protein structure. A coarse-  
426 grained structure was generated using the *martinize.py* script and the PDB structure. The  
427 coarse-grained  $\alpha$ -syn structure was then placed at a COM distance of 6 nm from the  
428 bilayer core in a parallel orientation (along the long protein axis) to the bilayer. The  
429 system was then solvated in a box of 13x13x18 nm<sup>3</sup> water and 150 mM NaCl. The  
430 simulation procedure was the same as previously described for bilayers alone, with the  
431 exception that the simulation duration was 4  $\mu$ s for each protein-bilayer system.

432 Simulations with membrane-bound and additional free  $\alpha$ -syn were conducted using the  
433 last frame of the 4  $\mu$ s simulation and adding another  $\alpha$ -syn at a COM distance of 6 nm  
434 from the membrane-bound  $\alpha$ -syn. Orientation of the free  $\alpha$ -syn was parallel to the bilayer  
435 using the same protein conformation as the initial  $\alpha$ -syn-bilayer simulation. Simulations  
436 for both POPC and POPS were carried out for 2  $\mu$ s each using the previously described  
437 parameters.

438

439

## 440 **Acknowledgements**

441 The work at University of Nebraska Medical Center was supported by grants from the  
442 National Institutes of Health (NIH) to Y.L.L. (R01 GM096039, R01GM118006 and R21  
443 NS101504). J.C.R. was supported by Branfman Family Foundation. M.H. was partially  
444 supported by the UNMC Graduate Fellowship. The computational modeling was partially  
445 performed using resources at the Holland Computing Center of the University of  
446 Nebraska, which receives support from the Nebraska Research Initiative.

447

448

## 449 **Author contribution**

450 Y.L.L., M.H. and L.V. designed the project. L.V., K.Z., S.B. performed AFM  
451 experiments; M.H. performed the molecular dynamics simulations; J.C.R. provided  $\alpha$ -  
452 synuclein protein samples. All authors wrote and edited the manuscript.

453

454

## 455 **Conflict of interest**

456 Authors declare no conflict of interest

457

## 458 **The paper explained**

### 459 **Problem**

460 Numerous studies have shown that amyloidogenic proteins, including  $\alpha$ -syn, are  
461 capable of spontaneous assembly into aggregates, and eventually form fibrillar structures  
462 found in amyloid or amyloid-like deposits. However, a critical obstacle exists for  
463 translating the current knowledge of amyloid proteins aggregation *in vitro* to the  
464 aggregation process *in vivo*: the concentration for the spontaneous aggregation of  
465 amyloid proteins *in vitro* is in the micromolar range, while physiological concentrations  
466 of amyloid proteins are in the low nanomolar range. This nearly thousand-fold difference  
467 in concentration suggests the potential role for other cellular factors in promoting  
468 aggregation at physiological amyloid proteins concentrations. We hypothesize that self-  
469 assembly of the disease-prone amyloid proteins aggregates is driven by the interaction of  
470 amyloid proteins with the cellular membrane.

### 471 **Results**

472 Consistent with this possibility, we have discovered a novel aggregation pathway  
473 in which spontaneous assembly of  $\alpha$ -syn protein at the physiological concentration range

474 occurs at the surface rather than in the bulk solution (i.e., an *on-surface* aggregation  
475 pathway). Our combined experimental and computer modeling approaches led us to the  
476 mechanism of the early stages of protein aggregation in which the key step triggering the  
477 disease is the interaction of  $\alpha$ -syn monomers with cellular membranes, which catalyzes  
478 the aggregation process.

#### 479 **Impact**

480 Our finding leads to the hypothesis that interaction of amyloid proteins with  
481 cellular membrane is the mechanism by which amyloid aggregation can initiate *in vivo* at  
482 the physiological concentration range, and the change in membrane properties leading to  
483 the increase in affinity of amyloid proteins to the membrane surface triggers of the  
484 amyloid aggregation, defining the disease state. Our model is a significant departure from  
485 the current model in which amyloid aggregation is linked to elevated synthesis of  
486 amyloid proteins. This is a paradigm shift for the development of efficient treatments and  
487 diagnostics for protein aggregation in neurodegenerative diseases.

488

489

490



491 **References**

492

493 Abedini A, Raleigh DP (2009) A role for helical intermediates in amyloid formation by natively  
494 unfolded polypeptides? *Phys Biol* 6: 015005

495

496 Abraham MJ, Murtola T, Schulz R, Páll S, Smith JC, Hess B, Lindahl E (2015) GROMACS: High  
497 performance molecular simulations through multi-level parallelism from laptops to  
498 supercomputers. *SoftwareX* 1–2: 19-25

499

500 Ahmed M, Davis J, Aucoin D, Sato T, Ahuja S, Aimoto S, Elliott JI, Van Nostrand WE, Smith SO  
501 (2010) Structural conversion of neurotoxic amyloid-beta(1-42) oligomers to fibrils. *Nat Struct*  
502 *Mol Biol* 17: 561-567

503

504 Banerjee S, Hashemi M, Lv Z, Maity S, Rochet JC, Lyubchenko YL (2017) A novel pathway for  
505 amyloids self-assembly in aggregates at nanomolar concentration mediated by the interaction  
506 with surfaces. *Scientific reports* 7: 45592

507

508 Bodner CR, Dobson CM, Bax A (2009) Multiple tight phospholipid-binding modes of alpha-  
509 synuclein revealed by solution NMR spectroscopy. *J Mol Biol* 390: 775-790

510

511 Bousset L, Pieri L, Ruiz-Arlandis G, Gath J, Jensen PH, Habenstein B, Madiona K, Olieric V,  
512 Bockmann A, Meier BH et al (2013) Structural and functional characterization of two alpha-  
513 synuclein strains. *Nat Commun* 4: 2575

514

515 Brundin P, Dave KD, Kordower JH (2017) Therapeutic approaches to target alpha-synuclein  
516 pathology. *Exp Neurol* 298: 225-235

517

518 Busche MA, Grienberger C, Keskin AD, Song B, Neumann U, Staufenberg M, Forstl H, Konnerth A  
519 (2015) Decreased amyloid-beta and increased neuronal hyperactivity by immunotherapy in  
520 Alzheimer's models. *Nat Neurosci* 18: 1725-1727

521

522 Chaudhary H, Iyer A, Subramaniam V, Claessens MM (2016) alpha-Synuclein Oligomers Stabilize  
523 Pre-Existing Defects in Supported Bilayers and Propagate Membrane Damage in a Fractal-Like  
524 Pattern. *Langmuir : the ACS journal of surfaces and colloids* 32: 11827-11836

525

526 Comellas G, Lemkau LR, Zhou DH, George JM, Rienstra CM (2012) Structural intermediates  
527 during alpha-synuclein fibrillogenesis on phospholipid vesicles. *J Am Chem Soc* 134: 5090-5099

528

- 529 Dante S, Hauss T, Brandt A, Dencher NA (2008) Membrane fusogenic activity of the Alzheimer's  
530 peptide A beta(1-42) demonstrated by small-angle neutron scattering. *Journal of molecular*  
531 *biology* 376: 393-404
- 532
- 533 Davidson WS, Jonas A, Clayton DF, George JM (1998) Stabilization of alpha-synuclein secondary  
534 structure upon binding to synthetic membranes. *J Biol Chem* 273: 9443-9449
- 535
- 536 de Jong DH, Singh G, Bennett WF, Arnarez C, Wassenaar TA, Schafer LV, Periole X, Tieleman DP,  
537 Marrink SJ (2013) Improved Parameters for the Martini Coarse-Grained Protein Force Field. *J*  
538 *Chem Theory Comput* 9: 687-697
- 539
- 540 Diao J, Burre J, Vivona S, Cipriano DJ, Sharma M, Kyoung M, Sudhof TC, Brunger AT (2013) Native  
541 alpha-synuclein induces clustering of synaptic-vesicle mimics via binding to phospholipids and  
542 synaptobrevin-2/VAMP2. *Elife* 2: e00592
- 543
- 544 Friedrich RP, Tepper K, Ronicke R, Soom M, Westermann M, Reymann K, Kaether C, Fandrich M  
545 (2010) Mechanism of amyloid plaque formation suggests an intracellular basis of Abeta  
546 pathogenicity. *Proc Natl Acad Sci U S A* 107: 1942-1947
- 547
- 548 Fusco G, De Simone A, Gopinath T, Vostrikov V, Vendruscolo M, Dobson CM, Veglia G (2014)  
549 Direct observation of the three regions in alpha-synuclein that determine its membrane-bound  
550 behaviour. *Nature communications* 5: 3827
- 551
- 552 Galvagnion C, Brown JW, Ouberai MM, Flagmeier P, Vendruscolo M, Buell AK, Sparr E, Dobson  
553 CM (2016) Chemical properties of lipids strongly affect the kinetics of the membrane-induced  
554 aggregation of alpha-synuclein. *Proceedings of the National Academy of Sciences of the United*  
555 *States of America* 113: 7065-7070
- 556
- 557 Galvagnion C, Buell AK, Meisl G, Michaels TC, Vendruscolo M, Knowles TP, Dobson CM (2015a)  
558 Lipid vesicles trigger alpha-synuclein aggregation by stimulating primary nucleation. *Nat Chem*  
559 *Biol* 11: 229-234
- 560
- 561 Galvagnion C, Buell AK, Meisl G, Michaels TC, Vendruscolo M, Knowles TP, Dobson CM (2015b)  
562 Lipid vesicles trigger alpha-synuclein aggregation by stimulating primary nucleation. *Nature*  
563 *chemical biology* 11: 229-234
- 564
- 565 Giusto NM, Salvador GA, Castagnet PI, Pasquaré SJ, Ilincheta de Boschero MG (2002) Age-  
566 Associated Changes in Central Nervous System Glycerolipid Composition and Metabolism.  
567 *Neurochemical Research* 27: 1513-1523
- 568
- 569 Goedert M, Spillantini MG, Del Tredici K, Braak H (2013) 100 years of Lewy pathology. *Nature*  
570 *reviews Neurology* 9: 13-24

571  
572 Green JD, Kreplak L, Goldsbury C, Li Blatter X, Stolz M, Cooper GS, Seelig A, Kistler J, Aebi U  
573 (2004) Atomic force microscopy reveals defects within mica supported lipid bilayers induced by  
574 the amyloidogenic human amylin peptide. *Journal of molecular biology* 342: 877-887

575  
576 Hardy J (1992) An 'anatomical cascade hypothesis' for Alzheimer's disease. *Trends Neurosci* 15:  
577 200-201

578  
579 Hardy JA, Higgins GA (1992) Alzheimer's disease: the amyloid cascade hypothesis. *Science* 256:  
580 184-185

581  
582 Jo E, McLaurin J, Yip CM, St George-Hyslop P, Fraser PE (2000) alpha-Synuclein membrane  
583 interactions and lipid specificity. *The Journal of biological chemistry* 275: 34328-34334

584  
585 Karran E, Mercken M, De Strooper B (2011) The amyloid cascade hypothesis for Alzheimer's  
586 disease: an appraisal for the development of therapeutics. *Nat Rev Drug Discov* 10: 698-712

587  
588 Krasnoslobodtsev AV, Peng J, Asiago JM, Hindupur J, Rochet JC, Lyubchenko YL (2012) Effect of  
589 spermidine on misfolding and interactions of alpha-synuclein. *PLoS One* 7: e38099

590  
591 Lee H-J, Choi C, Lee S-J (2002) Membrane-bound  $\alpha$ -synuclein has a high aggregation propensity  
592 and the ability to seed the aggregation of the cytosolic form. *J Biol Chem* 277: 671-678

593  
594 Lee JH, Hong CS, Lee S, Yang JE, Park YI, Lee D, Hyeon T, Jung S, Paik SR (2012) Radiating amyloid  
595 fibril formation on the surface of lipid membranes through unit-assembly of oligomeric species  
596 of alpha-synuclein. *PLoS One* 7: e47580

597  
598 Luth ES, Bartels T, Dettmer U, Kim NC, Selkoe DJ (2015) Purification of alpha-synuclein from  
599 human brain reveals an instability of endogenous multimers as the protein approaches purity.  
600 *Biochemistry* 54: 279-292

601  
602 Lv Z, Krasnoslobodtsev AV, Zhang Y, Ysselstein D, Rochet JC, Blanchard SC, Lyubchenko YL (2015)  
603 Direct Detection of alpha-Synuclein Dimerization Dynamics: Single-Molecule Fluorescence  
604 Analysis. *Biophysical journal* 108: 2038-2047

605  
606 Ouberai MM, Wang J, Swann MJ, Galvagnion C, Guilliams T, Dobson CM, Welland ME (2013)  
607 alpha-Synuclein senses lipid packing defects and induces lateral expansion of lipids leading to  
608 membrane remodeling. *The Journal of biological chemistry* 288: 20883-20895

609  
610 Pfefferkorn CM, Jiang Z, Lee JC (2012) Biophysics of alpha-synuclein membrane interactions.  
611 *Biochimica et biophysica acta* 1818: 162-171

612  
613 Quist A, Doudevski I, Lin H, Azimova R, Ng D, Frangione B, Kagan B, Ghiso J, Lal R (2005) Amyloid  
614 ion channels: a common structural link for protein-misfolding disease. Proceedings of the  
615 National Academy of Sciences of the United States of America 102: 10427-10432

616  
617 Rauscher S, Gapsys V, Gajda MJ, Zweckstetter M, de Groot BL, Grubmuller H (2015) Structural  
618 Ensembles of Intrinsically Disordered Proteins Depend Strongly on Force Field: A Comparison to  
619 Experiment. J Chem Theory Comput 11: 5513-5524

620  
621 Reynolds NP, Soragni A, Rabe M, Verdes D, Liverani E, Handschin S, Riek R, Seeger S (2011)  
622 Mechanism of membrane interaction and disruption by alpha-synuclein. J Am Chem Soc 133:  
623 19366-19375

624  
625 Riekkinen P, Rinne UK, Pelliniemi T, Sonninen V (1975) Interaction between dopamine and  
626 phospholipids: Studies of the substantia nigra in parkinson disease patients. Archives of  
627 Neurology 32: 25-27

628  
629 Ross CA, Poirier MA (2004) Protein aggregation and neurodegenerative disease. Nat Med 10  
630 Suppl: S10-17

631  
632 Shlyakhtenko LS, Gall AA, Lyubchenko YL (2013) Mica functionalization for imaging of DNA and  
633 protein-DNA complexes with atomic force microscopy. Methods in molecular biology 931: 295-  
634 312

635  
636 Stockl MT, Zijlstra N, Subramaniam V (2013) alpha-Synuclein oligomers: an amyloid pore?  
637 Insights into mechanisms of alpha-synuclein oligomer-lipid interactions. Molecular neurobiology  
638 47: 613-621

639  
640 Venda LL, Cragg SJ, Buchman VL, Wade-Martins R (2010) alpha-Synuclein and dopamine at the  
641 crossroads of Parkinson's disease. Trends Neurosci 33: 559-568

642  
643 Wang Y, Shi M, Chung KA, Zabetian CP, Leverenz JB, Berg D, Srulijes K, Trojanowski JQ, Lee VM,  
644 Siderowf AD et al (2012) Phosphorylated alpha-synuclein in Parkinson's disease. Sci Transl Med 4:  
645 121ra120

646  
647 Yesylevskyy SO, Schafer LV, Sengupta D, Marrink SJ (2010) Polarizable water model for the  
648 coarse-grained MARTINI force field. PLoS Comput Biol 6: e1000810

649  
650 Yip CM, Darabie AA, McLaurin J (2002) Abeta42-peptide assembly on lipid bilayers. Journal of  
651 molecular biology 318: 97-107

652

653 Yip CM, McLaurin J (2001) Amyloid-beta peptide assembly: a critical step in fibrillogenesis and  
654 membrane disruption. *Biophysical journal* 80: 1359-1371

655

656 Ysselstein D, Dehay B, Costantino IM, McCabe GP, Frosch MP, George JM, Bezard E, Rochet JC  
657 (2017) Endosulfine- $\alpha$  inhibits membrane-induced  $\alpha$ -synuclein aggregation and protects  
658 against  $\alpha$ -synuclein neurotoxicity. *Acta neuropathologica communications* 5: 3

659

660 Ysselstein D, Joshi M, Mishra V, Griggs AM, Asiago JM, McCabe GP, Stanciu LA, Post CB, Rochet  
661 JC (2015) Effects of impaired membrane interactions on  $\alpha$ -synuclein aggregation and  
662 neurotoxicity. *Neurobiology of disease* 79: 150-163

663

664

665

### 666 **Figure Legends:**

667 **Figure 1:** Time-lapse AFM images to characterize  $\alpha$ -syn aggregation on supported POPC  
668 lipid bilayer (SLB).

669 **(a)** POPC and POPS were used in the present study, and their chemical structures are  
670 shown (left). Schematic of a supported lipid bilayer (SLB) on freshly cleaved mica (right).  
671 The schematic is only for displaying the model for supported lipid bilayer, it does not  
672 indicate any phase of the bilayer.

673 **(b)** Image of the POPC SLB surface immediately after buffer exchange with 10 nM  $\alpha$ -  
674 syn solution.

675 **(c)-(e)**, Images of SLB surface taken at time-points after adding the protein. Insets show  
676 zoomed images of three representative aggregates.

677 **(f)** Graph showing the evolution of aggregate quantity and mean volume with respect to  
678 time. The data are shown as the mean  $\pm$  SD.

679 The scale bar in panels **(b)-(e)** is 1  $\mu$ m, and the Z-scale is shown to the right of panel **(e)**.

680

681 **Figure 2.**  $\alpha$ -Syn shows enhanced aggregation kinetics on a supported POPS bilayer.

682 **(a)-(d)** AFM images acquired at time-points after buffer exchange with 10 nM protein  
683 solution. Insets show zoomed images of three representative aggregates for the selected  
684 time-points.

685 **(e)** Graph showing the time-dependent evolution of aggregate quantity and mean volume.

686 The data are shown as the mean  $\pm$  SD. The scale bar in panels **(a)-(d)** is 1  $\mu$ m, and the Z-  
687 scale is shown to the right of panel **(d)**.

688

689 **Figure 3.**  $\alpha$ -syn aggregation on a POPC/POPS SLB.

690 **(a)** AFM image of initial bilayer immediately after the exchange.

691 **(b)-(d)** correspond to images taken with 1 h time intervals. Zoomed images of three  
692 representative aggregates are shown on the right side of images.

693 **(e)** Line plot showing the time-dependent evolution of aggregate quantity and mean  
694 volume. The data are shown as the mean  $\pm$  SD.

695 The scale bar in panels **(a)-(d)** is 1  $\mu$ m, and the Z-scale is shown to the right of panel **(d)**.

696

697 **Figure 4.** Dynamics of  $\alpha$ -syn aggregates on POPS SLB.

698 **(a-b)** AFM image captured after 6 h and 6.5 h. The aggregates highlighted with black  
699 arrows are features that did not change between frames and demonstrate the absence of  
700 drift.

701 Blue arrows in panel **(a)** correspond to aggregates that have dissociated in panel **(b)**. New  
702 aggregates that appeared in **(b)** are highlighted with green. A growing aggregate is  
703 highlighted in yellow.

704

705 **Figure 5.** Accumulation of  $\alpha$ -syn aggregates in solution from POPC SLB.

706 10 nM  $\alpha$ -syn solution was incubated in the presence of a POPC SLB. 5  $\mu$ l of the solution  
707 was taken out at different time-points (6 h, 24 h, 48 h) and analyzed by AFM. Solid black  
708 bars show the number of aggregates, which appeared in the bulk from the POPC SLB, at  
709 different times. In a parallel experiment, a 10 nM  $\alpha$ -syn solution was incubated in a test  
710 tube, and an aliquot of 5  $\mu$ l was taken out at similar time-points and analyzed by AFM to  
711 check aggregation in the absence of a POPC SLB (striped bars). Aggregates were  
712 counted in 2  $\mu$ m  $\times$  2  $\mu$ m AFM images.

713

714 **Figure 6.** Molecular dynamics (MD) simulations of  $\alpha$ -syn interaction with lipid bilayers  
715 reveal distinct conformations.

716 **(a-b)** The results show stable binding of  $\alpha$ -syn to POPC **(a)** and POPS **(b)** bilayers; time-  
717 resolved stability is presented in Figure S6.

718 **(c)** Top and side view snapshots of the last frame, at 4  $\mu$ s, of the MD simulations for  
719 POPC and POPS, left and right respectively. The  $\alpha$ -syn N-terminal segment is colored  
720 blue, the NAC region is in green, and the C-terminal segment is in red. N- and C-terminal

721 residues are highlighted with a sphere. Lipid tails are in grey while the POPC and POPS  
722 head groups are in purple and blue, respectively.

723

724 **Figure 7.** Model for membrane surface catalyzed amyloid aggregation process.

725 (a) A lipid bilayer with free  $\alpha$ -syn monomers far from the membrane surface.

726 (b) Interaction with membrane induces conformation change in the  $\alpha$ -syn monomer.

727 (c)-(d) The membrane-bound monomer acts as an anchor and attracts free monomers,  
728 leading to the formation of oligomers. This process can repeat multiple times, for each  
729 repeat the oligomer grows.

730 (e) Oligomer dissociates from the membrane to the bulk solution.

731

732 **Table 1:** Summary of results from three independent experiments. Volume and number  
733 of aggregates on POPC, POPS and POPC/POPS surfaces at different time intervals are  
734 shown.

735

736 **Expanded View Figure Legends:**

737 **Figure EV1:** Volume distributions of  $\alpha$ -syn aggregates on different surfaces at different  
738 time points. Each row represents data from the same surface, while each column is a  
739 different incubation time-point. The black curves are Gaussian fits. The most probable  
740 volumes are shown as mean  $\pm$  SD. The number of aggregates is provided in the bottom-  
741 right corner of each graph.

742

743 **Movie EV1:** MD simulation of  $\alpha$ -syn interaction with a POPC lipid bilayer. Stable  
744 binding of the  $\alpha$ -syn protein to the bilayer is observed. The  $\alpha$ -syn N-terminal segment is  
745 colored blue, NAC region is in green, and the C-terminal segment is in red. N- and C-  
746 terminal residues are highlighted with a sphere. Lipid tails are in grey, while the POPC  
747 head groups are in purple.

748

749 **Movie EV2:** MD simulation of  $\alpha$ -syn interaction with a POPS lipid bilayer. The stable  
750 binding event of  $\alpha$ -syn to the bilayer is shown.  $\alpha$ -syn N-terminal segment is colored blue,  
751 NAC region is in green, and the C-terminal segment is in red. N- and C-terminal residues  
752 are highlighted with a sphere. Lipid tails are in grey, while the POPS head groups are in  
753 blue.

754

755 **Movie EV3:** MD simulation of a free  $\alpha$ -syn interacting with a membrane bound  $\alpha$ -syn on

|              |     | POPC                                      |                     | POPS                                      |                     | POPC/POPS                                 |                     |
|--------------|-----|-------------------------------------------|---------------------|-------------------------------------------|---------------------|-------------------------------------------|---------------------|
|              |     | Volume <sup>3</sup><br>(nm <sup>3</sup> ) | Aggregate<br>Number | Volume <sup>3</sup><br>(nm <sup>3</sup> ) | Aggregate<br>Number | Volume <sup>3</sup><br>(nm <sup>3</sup> ) | Aggregate<br>Number |
| Experiment 1 | 1 h | --                                        | --                  | 143±41                                    | 129                 | --                                        | --                  |
|              | 2 h | --                                        | --                  | 182±40                                    | 130                 | 137±37                                    | 82                  |
|              | 3 h | 184±59                                    | 95                  | 255±94                                    | 141                 | 187±59                                    | 176                 |

756 a POPC bilayer. The binding of  $\alpha$ -syn to the bilayer is shown.  $\alpha$ -syn N-terminal segment  
757 is colored blue, NAC region is in green, and the C-terminal segment is in red. N- and C-  
758 terminal residues are highlighted with a sphere. Lipid tails are in grey, while the POPS  
759 head groups are in blue.

760

761 **Movie EV4:** MD simulation of a free  $\alpha$ -syn interacting with a membrane bound  $\alpha$ -syn on  
762 a POPS bilayer. The binding of  $\alpha$ -syn to the membrane-bound  $\alpha$ -syn is shown.  $\alpha$ -syn N-  
763 terminal segment is colored blue, NAC region is in green, and the C-terminal segment is  
764 in red. N- and C-terminal residues are highlighted with a sphere. Lipid tails are in grey,  
765 while the POPS head groups are in blue.

766

767

768

769

770



|              |     |        |     |         |     |         |     |
|--------------|-----|--------|-----|---------|-----|---------|-----|
|              | 4 h | 223±46 | 149 | 387±140 | 324 | 248±87  | 291 |
|              | 5 h | 276±73 | 190 | 417±161 | 404 | 312±116 | 372 |
| Experiment 2 | 1 h | --     | --  | 123±48  | 116 | --      | --  |
|              | 2 h | --     | --  | 169±42  | 120 | 112±48  | 71  |
|              | 3 h | 159±53 | 86  | 227±91  | 272 | 176±73  | 166 |
|              | 4 h | 198±45 | 132 | 331±126 | 307 | 209±96  | 272 |
|              | 5 h | 228±85 | 172 | 363±165 | 383 | 289±136 | 351 |
| Experiment 3 | 1 h | --     | --  | 143±53  | 125 | --      | --  |
|              | 2 h | --     | --  | 212±47  | 140 | 157±46  | 91  |
|              | 3 h | 179±82 | 106 | 284±95  | 153 | 200±67  | 187 |
|              | 4 h | 240±41 | 161 | 414±142 | 343 | 277±83  | 283 |
|              | 5 h | 319±96 | 206 | 460±163 | 425 | 347±113 | 356 |

771 **Table 1.**

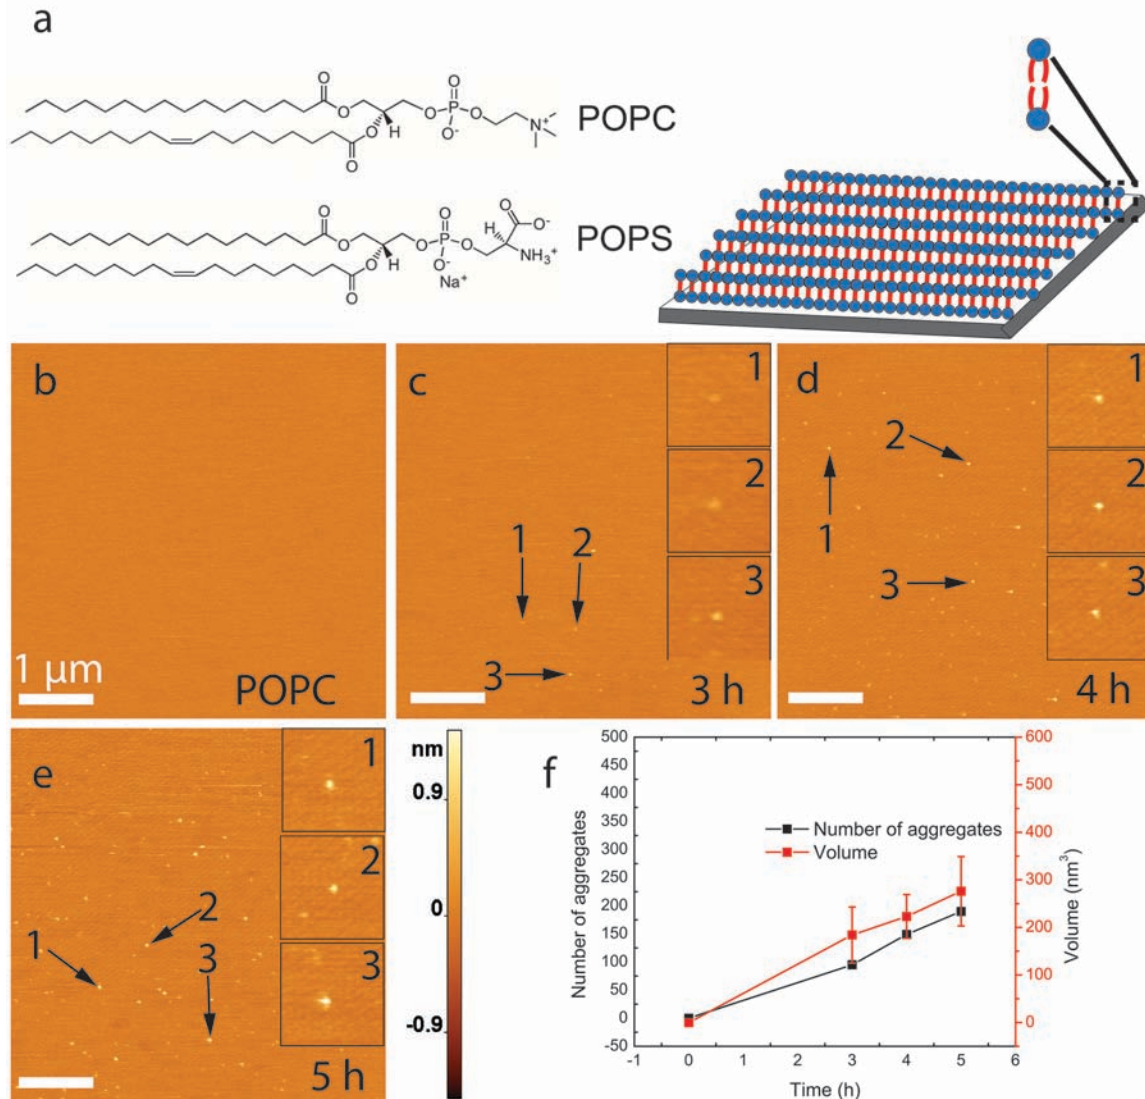

1  
2 **Figure 1.** Time-lapse AFM images to characterize  $\alpha$ -syn aggregation on supported POPC  
3 lipid bilayer (SLB). **(a)** POPC and POPS were used in the present study, and their  
4 chemical structures are shown (left). Schematic of a supported lipid bilayer (SLB) on  
5 freshly cleaved mica (right). The schematic is only for displaying the model for supported  
6 lipid bilayer, it does not indicate any phase of the bilayer. **(b)** Image of the POPC SLB  
7 surface immediately after buffer exchange with 10 nM  $\alpha$ -syn solution. **(c)-(e)**, Images of  
8 SLB surface taken at time-points after adding the protein. Insets show zoomed images of  
9 three representative aggregates. **(f)** Graph showing the evolution of aggregate quantity  
10 and mean volume with respect to time. The data are shown as the mean  $\pm$  SD. The scale  
11 bar in panels **(b)-(e)** is 1  $\mu$ m, and the Z-scale is shown to the right of panel **(e)**.

12

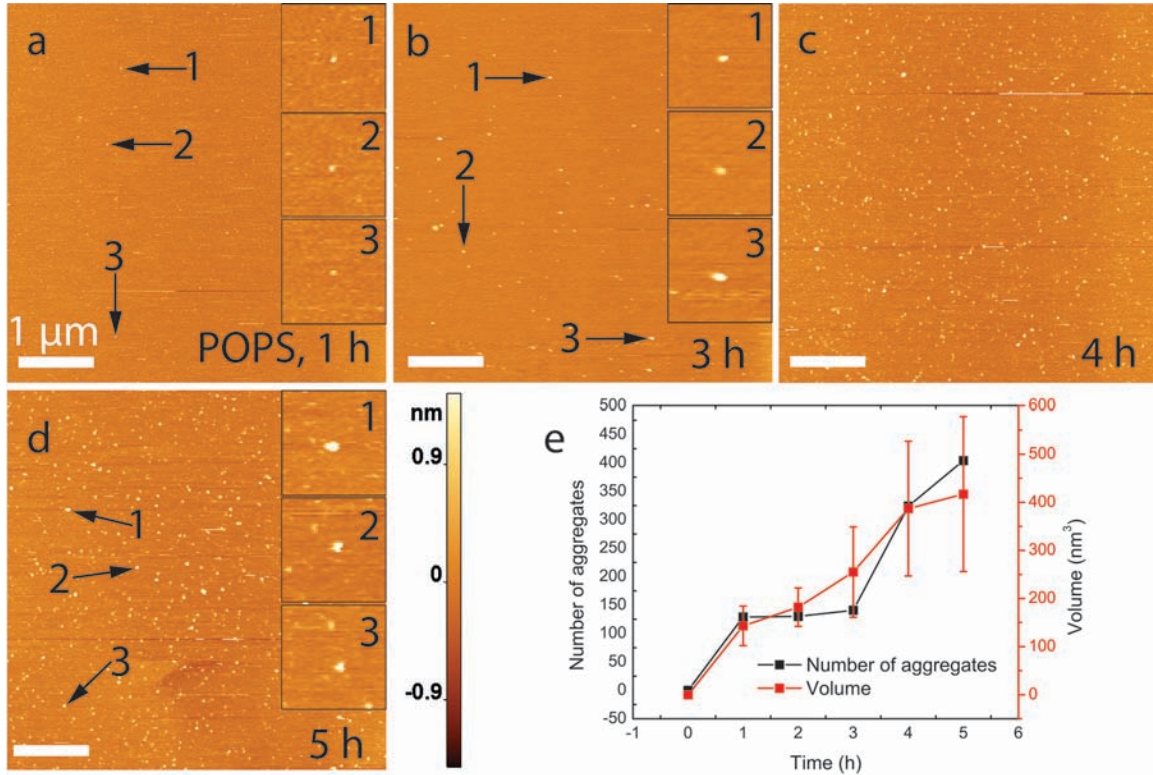

13  
14 **Figure 2.**  $\alpha$ -Syn shows enhanced aggregation kinetics on a supported POPS bilayer. **(a)-**  
15 **(d)** AFM images acquired at time-points after buffer exchange with 10 nM protein  
16 solution. Insets show zoomed images of three representative aggregates for the selected  
17 time-points. **(e)** Graph showing the time-dependent evolution of aggregate quantity and  
18 mean volume. The data are shown as the mean  $\pm$  SD. The scale bar in panels **(a)-(d)** is 1  
19  $\mu$ m, and the Z-scale is shown to the right of panel **(d)**.

20

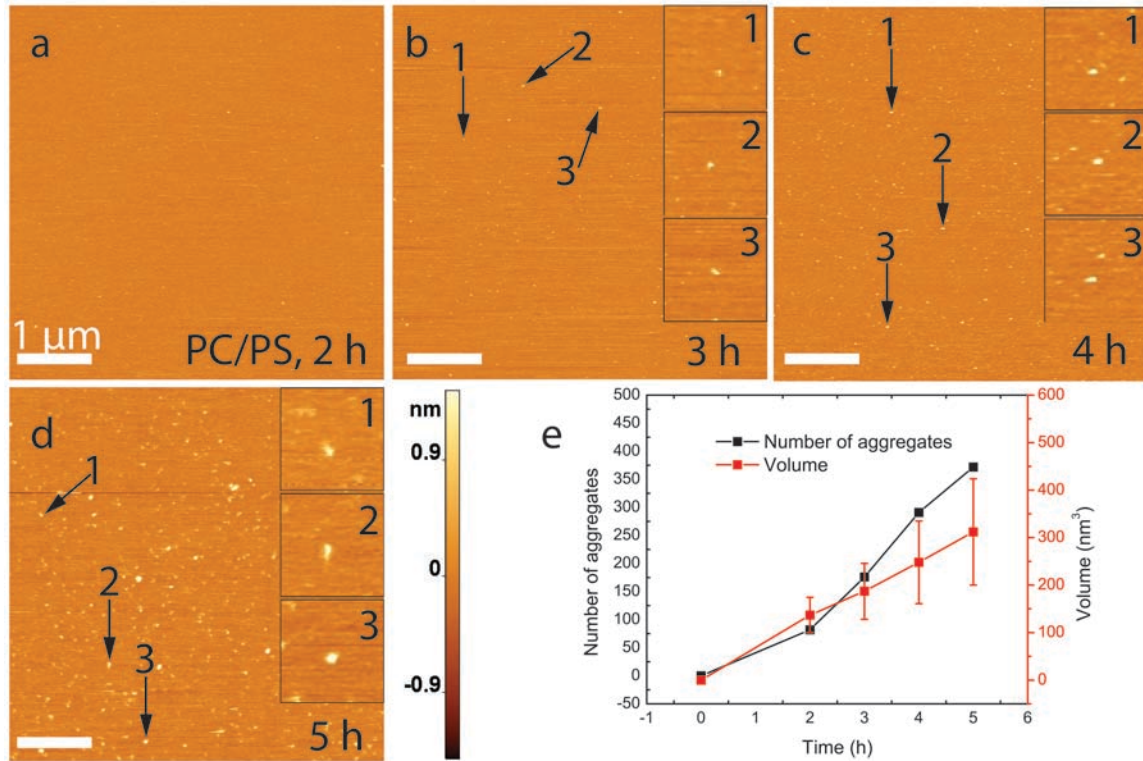

21

22 **Figure 3.**  $\alpha$ -syn aggregation on a POPC/POPS SLB. **(a)** AFM image of initial bilayer acquired  
23 immediately after the exchange. **(b)-(d)** correspond to images taken with 1 h time intervals.  
24 Zoomed images of three representative aggregates are shown on the right side of images. **(e)**  
25 Line plot showing the time-dependent evolution of aggregate quantity and mean volume. The  
26 data are shown as the mean  $\pm$  SD. The scale bar in panels **(a)-(d)** is 1  $\mu$ m, and the Z-scale is  
27 shown to the right of panel **(d)**.

28

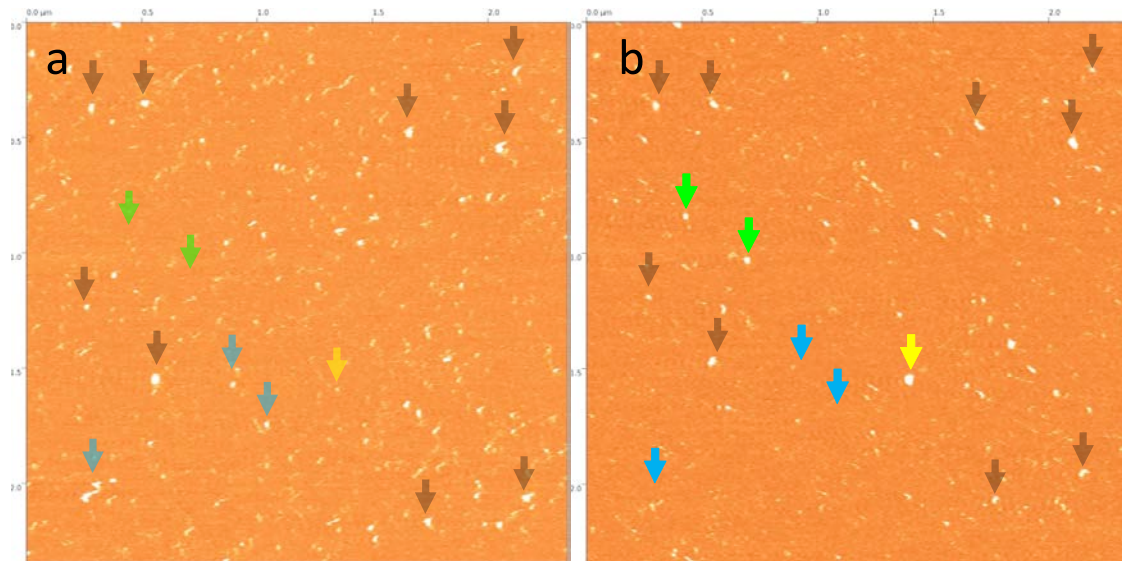

29

30 **Figure 4.** Dynamics of  $\alpha$ -syn aggregates on POPS SLB captured after 6 h **(a)** and 6.5 h **(b)**. The  
31 aggregates highlighted with black arrows are features that did not change between frames and  
32 demonstrate the absence of drift. Blue arrows in panel **(a)** correspond to aggregates that have  
33 dissociated in panel **(b)**. New aggregates that appeared in **(b)** are highlighted with green. A  
34 growing aggregate is highlighted in yellow.

35

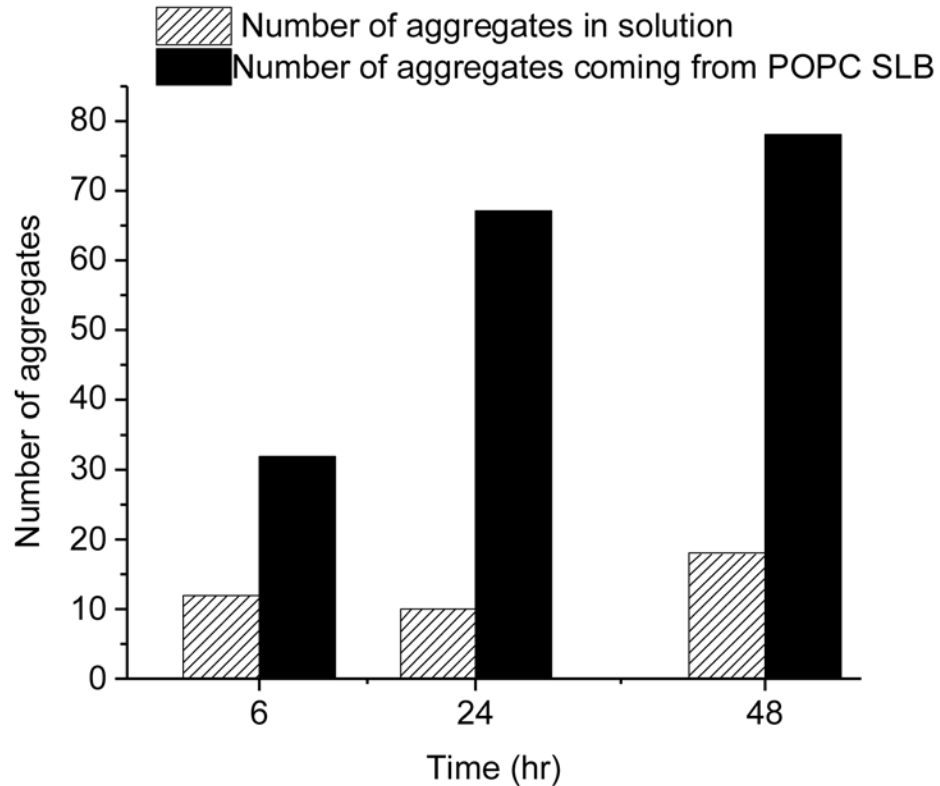

36

37 **Figure 5.** Accumulation of  $\alpha$ -syn aggregates in solution from POPC SLB. A 10 nM  $\alpha$ -syn  
38 solution was incubated in the presence of a POPC SLB. 5  $\mu$ l of the solution was taken out  
39 at different time-points (6 h, 24 h, 48 h) and analyzed by AFM. Solid black bars show the  
40 number of aggregates, which appeared in the bulk from the POPC SLB, at different times.  
41 In a parallel experiment, a 10 nM  $\alpha$ -syn solution was incubated in a test tube, and an  
42 aliquot of 5  $\mu$ l was taken out at similar time-points and analyzed by AFM to check  
43 aggregation in the absence of a POPC SLB (striped bars). Aggregates were counted in 2  
44  $\mu$ m  $\times$  2  $\mu$ m AFM images.

45

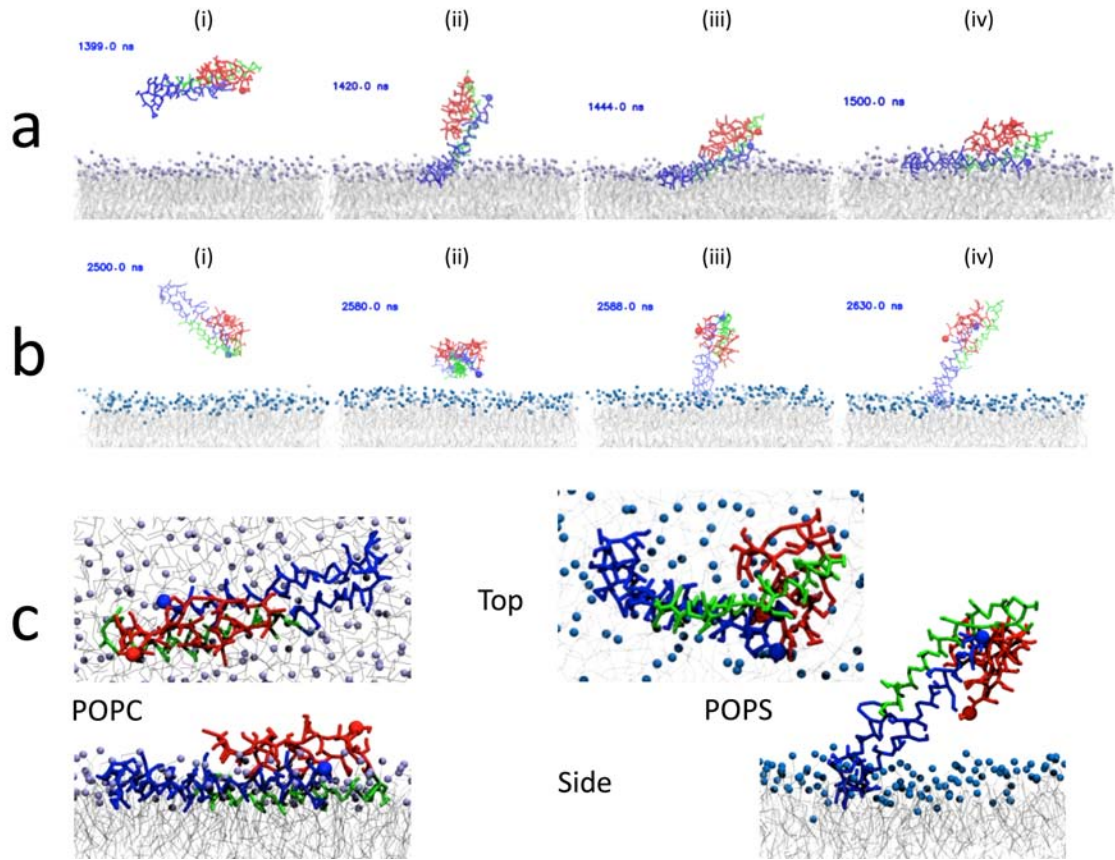

46  
47 **Figure 6.** Molecular dynamics (MD) simulations of  $\alpha$ -syn interaction with lipid bilayers  
48 reveal distinct conformations. The results show stable binding of  $\alpha$ -syn to POPC (a) and  
49 POPS (b) bilayers; time-resolved stability is presented in Figure S6. (c) Top and side  
50 view snapshots of the last frame, at 4  $\mu$ s, of the MD simulations for POPC and POPS, left  
51 and right respectively. The  $\alpha$ -syn N-terminal segment is colored blue, the NAC region is  
52 in green, and the C-terminal segment is in red. N- and C-terminal residues are highlighted  
53 with a sphere. Lipid tails are in grey while the POPC and POPS head groups are in purple  
54 and blue, respectively.

55

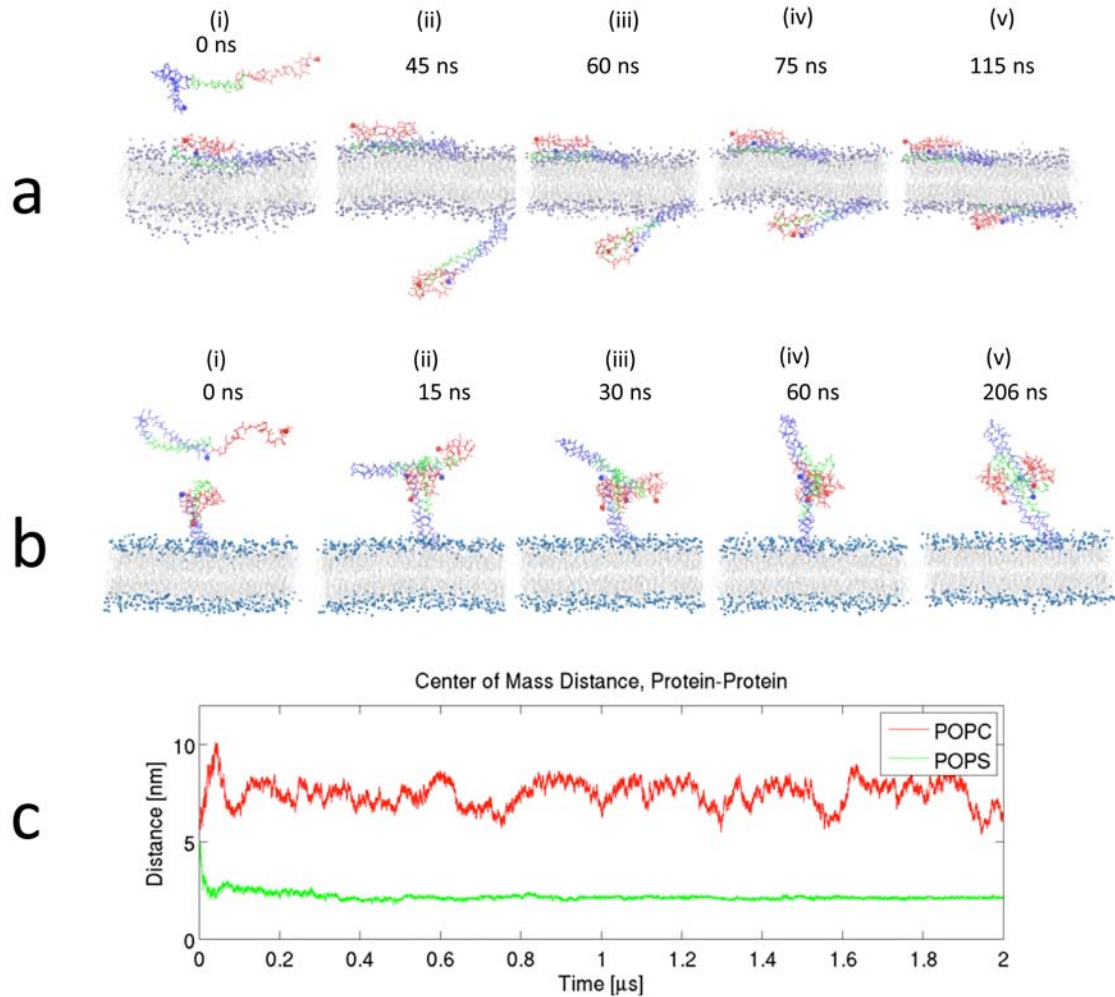

56  
57 **Figure 7.** Results of MD simulations showing interaction between a free and a  
58 membrane-bound  $\alpha$ -syn. **(a)** Binding of a free  $\alpha$ -syn to the POPC membrane; the free  $\alpha$ -  
59  $\alpha$ -syn traverses through the periodic boundary (PB) to the inner leaflet and stably binds;  
60 mode of interaction is similar to the initial  $\alpha$ -syn interaction in Figure 4a. **(b)** On POPS  
61 the free  $\alpha$ -syn rapidly binds membrane-bound  $\alpha$ -syn through NAC-NAC and NAC-C-  
62 terminal interactions. **(c)** Center of mass (CoM) distance between the two  $\alpha$ -syn  
63 molecules for the POPC and POPS systems. For POPC, after the transition through the  
64 PB, the fluctuations in CoM distance reflect the diffusion of the proteins in the XY-plane.  
65 The  $\alpha$ -syn N-terminal segment is colored blue, the NAC region is in green, and the C-  
66 terminal segment is in red. N- and C-terminal residues are highlighted with a sphere.  
67 Lipid tails are in grey, while the POPC and POPS head groups are in purple and blue,  
68 respectively.

69



70

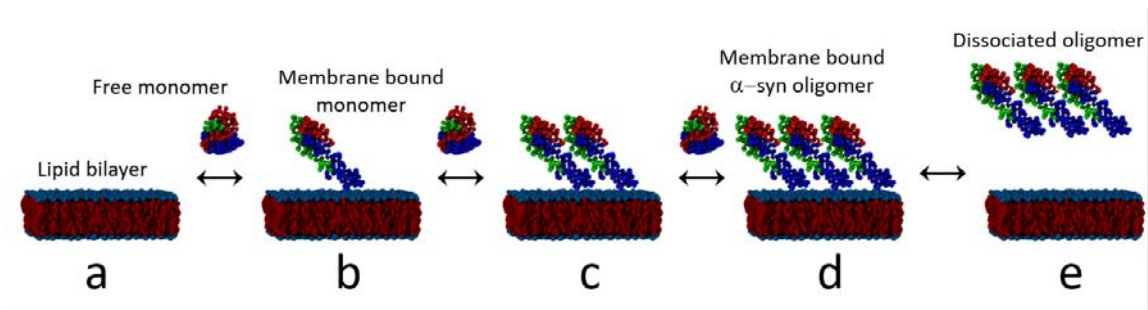

71

72 **Figure 8.** Model for membrane surface catalyzed amyloid aggregation process. **(a)** A lipid  
73 bilayer with free  $\alpha$ -syn monomers far from the membrane surface. **(b)** Interaction with  
74 membrane induces conformation change in the  $\alpha$ -syn monomer. **(c)-(d)** The membrane-  
75 bound monomer acts as an anchor and attracts free monomers, leading to the formation of  
76 oligomers. This process can repeat multiple times, for each repeat the oligomer grows. **(e)**  
77 Oligomer dissociates from the membrane to the bulk solution.

78

## Expanded View Figures

### **Phospholipid membranes promote the early stage assembly of $\alpha$ -synuclein aggregates**

Zhengjian Lv<sup>1,2, a</sup>, Mohtadin Hashemi<sup>1, a</sup>, Siddhartha Banerjee<sup>1</sup>, Karen Zagorski<sup>1</sup>, Jean-Christophe Rochet<sup>3,4</sup>, and Yuri L. Lyubchenko<sup>1,\*</sup>

<sup>1</sup>Department of Pharmaceutical Sciences, University of Nebraska Medical Center, 986025  
Nebraska Medical Center, Omaha, NE 68198-6025

<sup>2</sup>Bruker Nano Surfaces Division, 112 Robin Hill Road, Goleta, Santa Barbara, CA, 93117, USA

<sup>3</sup>Department of Medicinal Chemistry and Molecular Pharmacology and <sup>4</sup>Purdue Institute for Integrative Neuroscience, Purdue University, West Lafayette, Indiana, USA

<sup>a</sup> These authors contributed equally.

\* E-mail: [ylyubchenko@unmc.edu](mailto:ylyubchenko@unmc.edu)

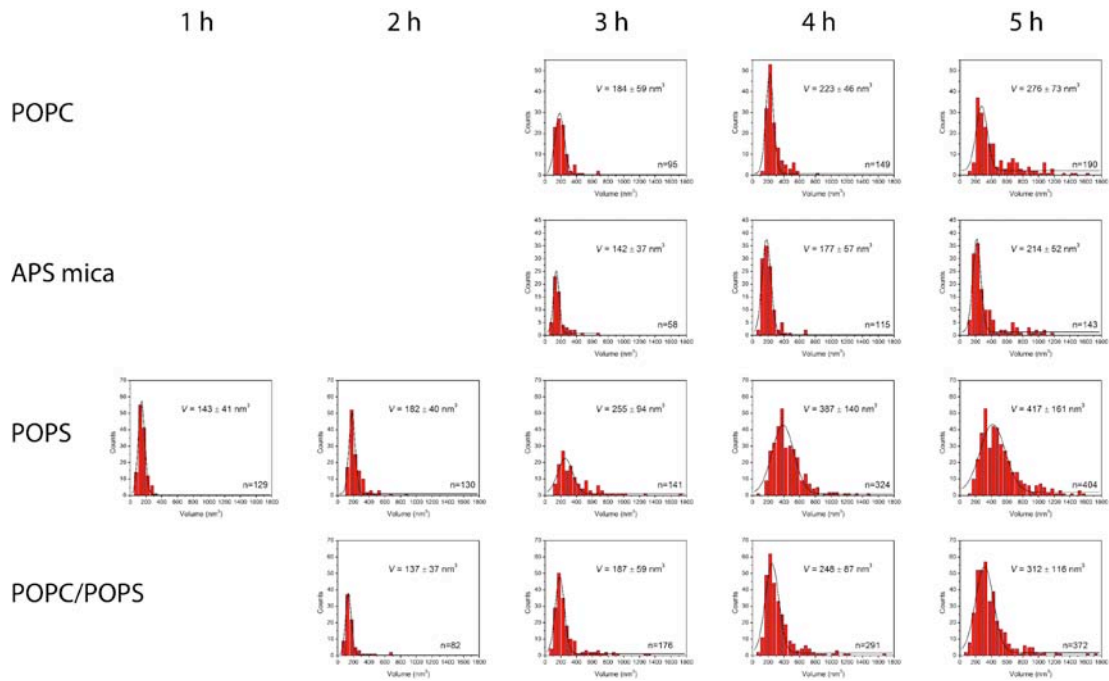

**Figure EV1.** Volume distributions of  $\alpha$ -syn aggregates on different surfaces at different time points. Each row represents data from the same surface, while each column is a different incubation time-point. The black curves are Gaussian fits. The most probable volumes are shown as mean  $\pm$  SD. The number of aggregates is provided in the bottom-right corner of each graph.

□

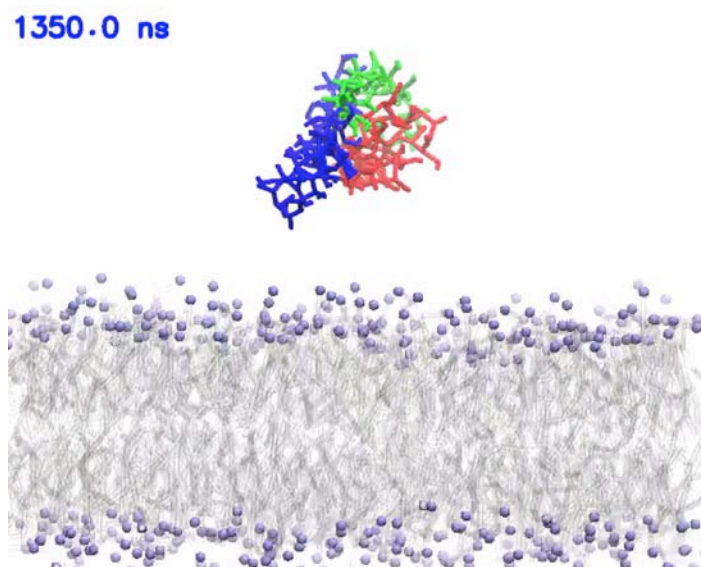

**Movie EV1.** MD simulation of  $\alpha$ -syn interaction with a POPC lipid bilayer. Stable binding of the  $\alpha$ -syn protein to the bilayer is observed. The  $\alpha$ -syn N-terminal segment is colored blue, NAC region is in green, and the C-terminal segment is in red. N- and C-terminal residues are highlighted with a sphere. Lipid tails are in grey, while the POPC head groups are in purple.

□

2550.0 ns

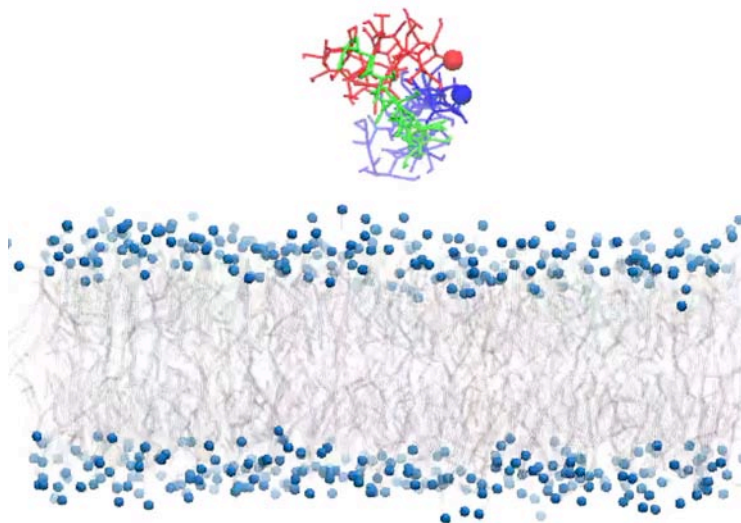

**Movie EV2.** MD simulation of  $\alpha$ -syn interaction with a POPS lipid bilayer. The stable binding event of  $\alpha$ -syn to the bilayer is shown.  $\alpha$ -syn N-terminal segment is colored blue, NAC region is in green, and the C-terminal segment is in red. N- and C-terminal residues are highlighted with a sphere. Lipid tails are in grey, while the POPS head groups are in blue.



□

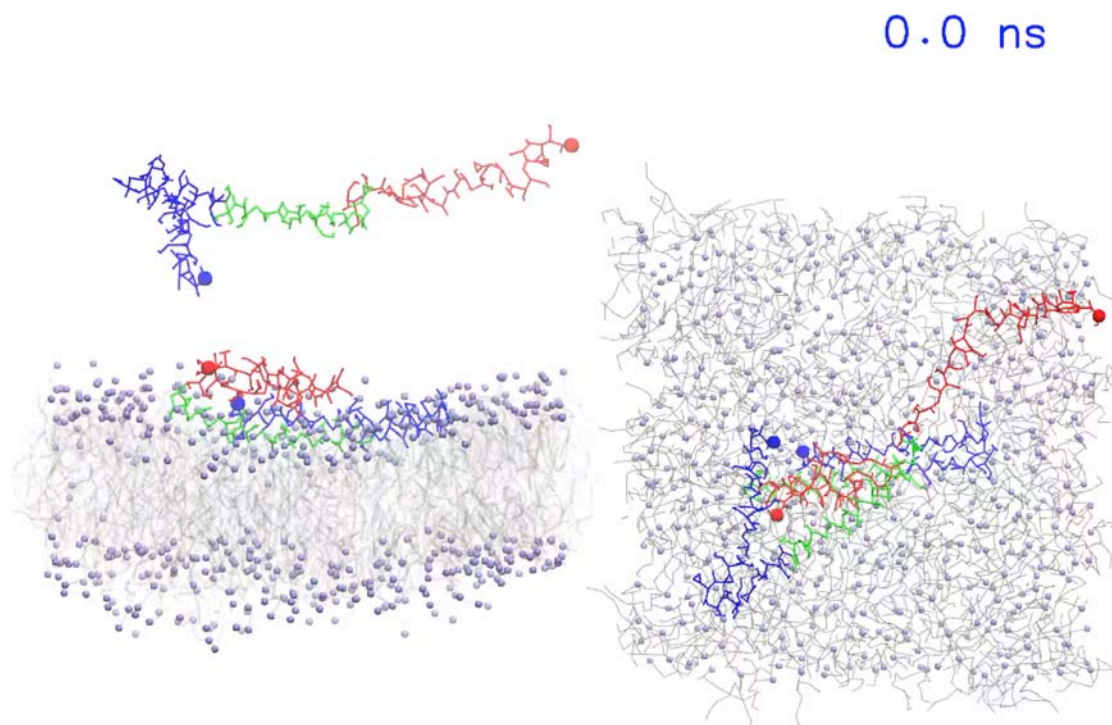

**Movie EV3.** MD simulation of a free  $\alpha$ -syn interacting with a membrane bound  $\alpha$ -syn on a POPC bilayer. The binding of  $\alpha$ -syn to the bilayer is shown.  $\alpha$ -syn N-terminal segment is colored blue, NAC region is in green, and the C-terminal segment is in red. N- and C-terminal residues are highlighted with a sphere. Lipid tails are in grey, while the POPS head groups are in blue.

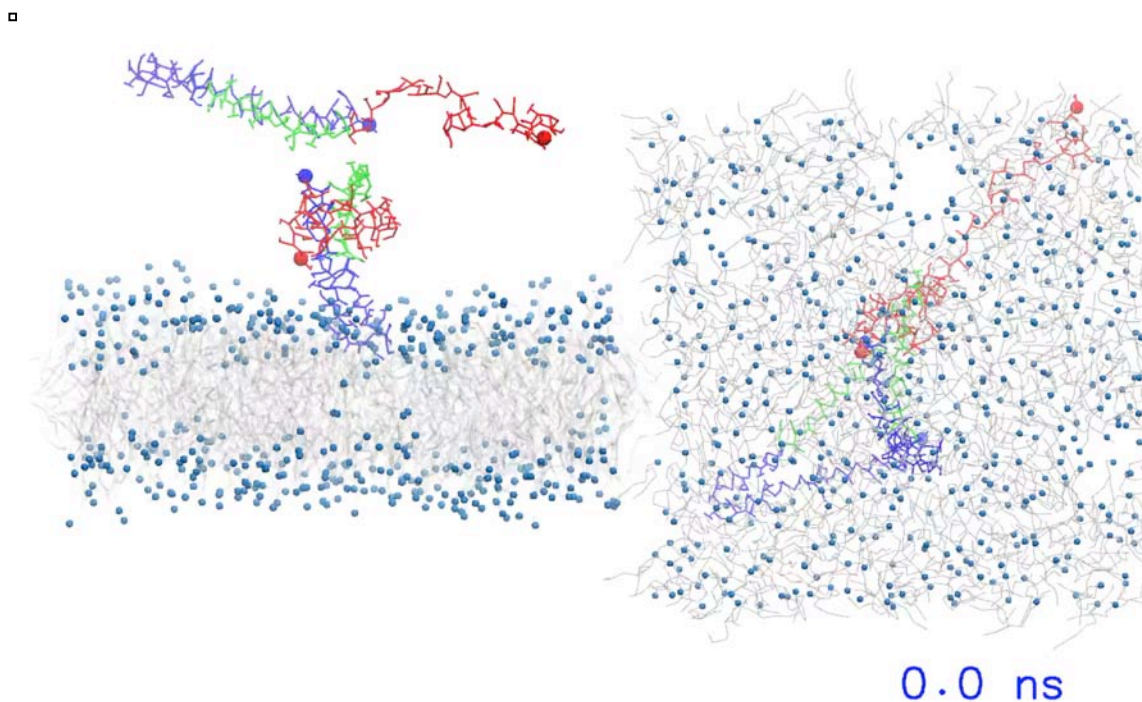

**Movie EV4.** MD simulation of a free  $\alpha$ -syn interacting with a membrane bound  $\alpha$ -syn on a POPS bilayer. The binding of  $\alpha$ -syn to the membrane-bound  $\alpha$ -syn is shown.  $\alpha$ -syn N-terminal segment is colored blue, NAC region is in green, and the C-terminal segment is in red. N- and C-terminal residues are highlighted with a sphere. Lipid tails are in grey, while the POPS head groups are in blue.
